# Supplementary material for: Nogo-A Induced Polymerization of Microtubule Is Involved in the Inflammatory Heat Hyperalgesia in Rat Dorsal Root Ganglion Neurons
Source: MDPI journal article supplement (doi:10.3390/ijms221910360), 2021-09-26
Supplement: s1 [file s1]

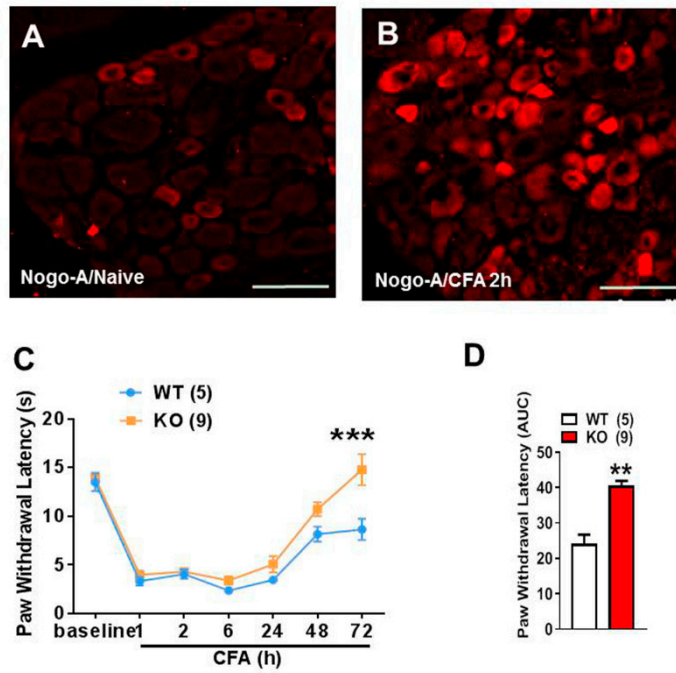

Supplementary Figure S1. Nogo-A in DRG contributed the development of CFA-induced inflammatory pain. (A,B) Immunofluorescence staining demonstrated that the Nogo-A expression in DRG neurons of CFA-treated rats (B) was obviously elevated compared with that of the naive rats(A). (C,D) Time course of PWL and quantification analysis of the area under the curve (1 - 72 h) showed knock out of Nogo-A attenuated the inflammatory heat hyperalgesia significantly after CFA administration (\*\* $p < 0.001$ , 2-way ANOVA followed by Bonferroni' s post hoc test,  $n = 5, 9$ ; \*\*  $p < 0.01$ , unpaired t-test,  $n = 5, 9$ ).
